# Supplementary material for: Hypoimmunogenic Human Pluripotent Stem Cells as a Powerful Tool for Liver Regenerative Medicine
Source: MDPI journal article supplement (doi:10.3390/ijms241411810), 2023-07-22
Supplement: s1 [file s1]

**A**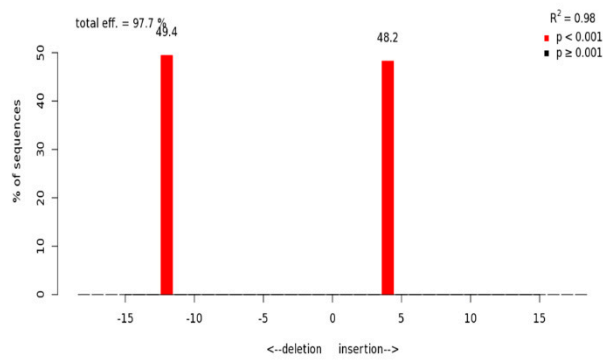**B**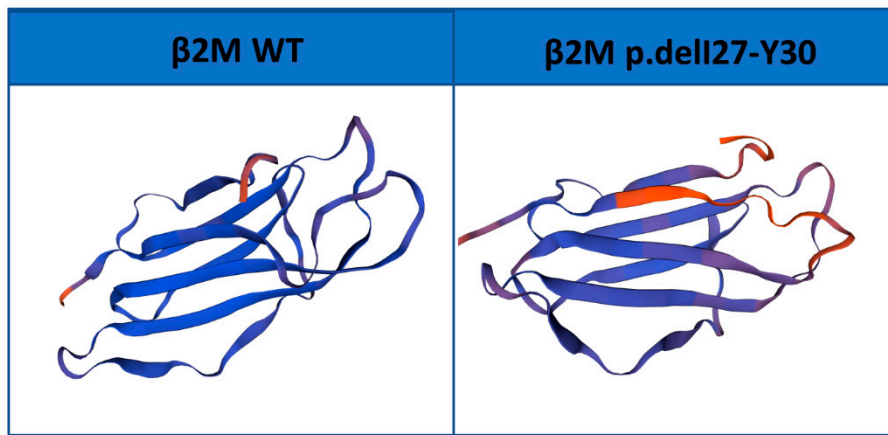

**Figure S1.** Analysis of *B2M* on-target locus and protein outcome in M HYPO clone: **(A)** Analysis of *B2M* on-target locus using the Tracking of Indels by Decomposition online tool. **(B)** Molecular modelling of  $\beta 2M$  protein (P61769) with the p.delI27-Y30 deletion as a consequence of the indel mutation following CRISPR/Cas9 gene editing.

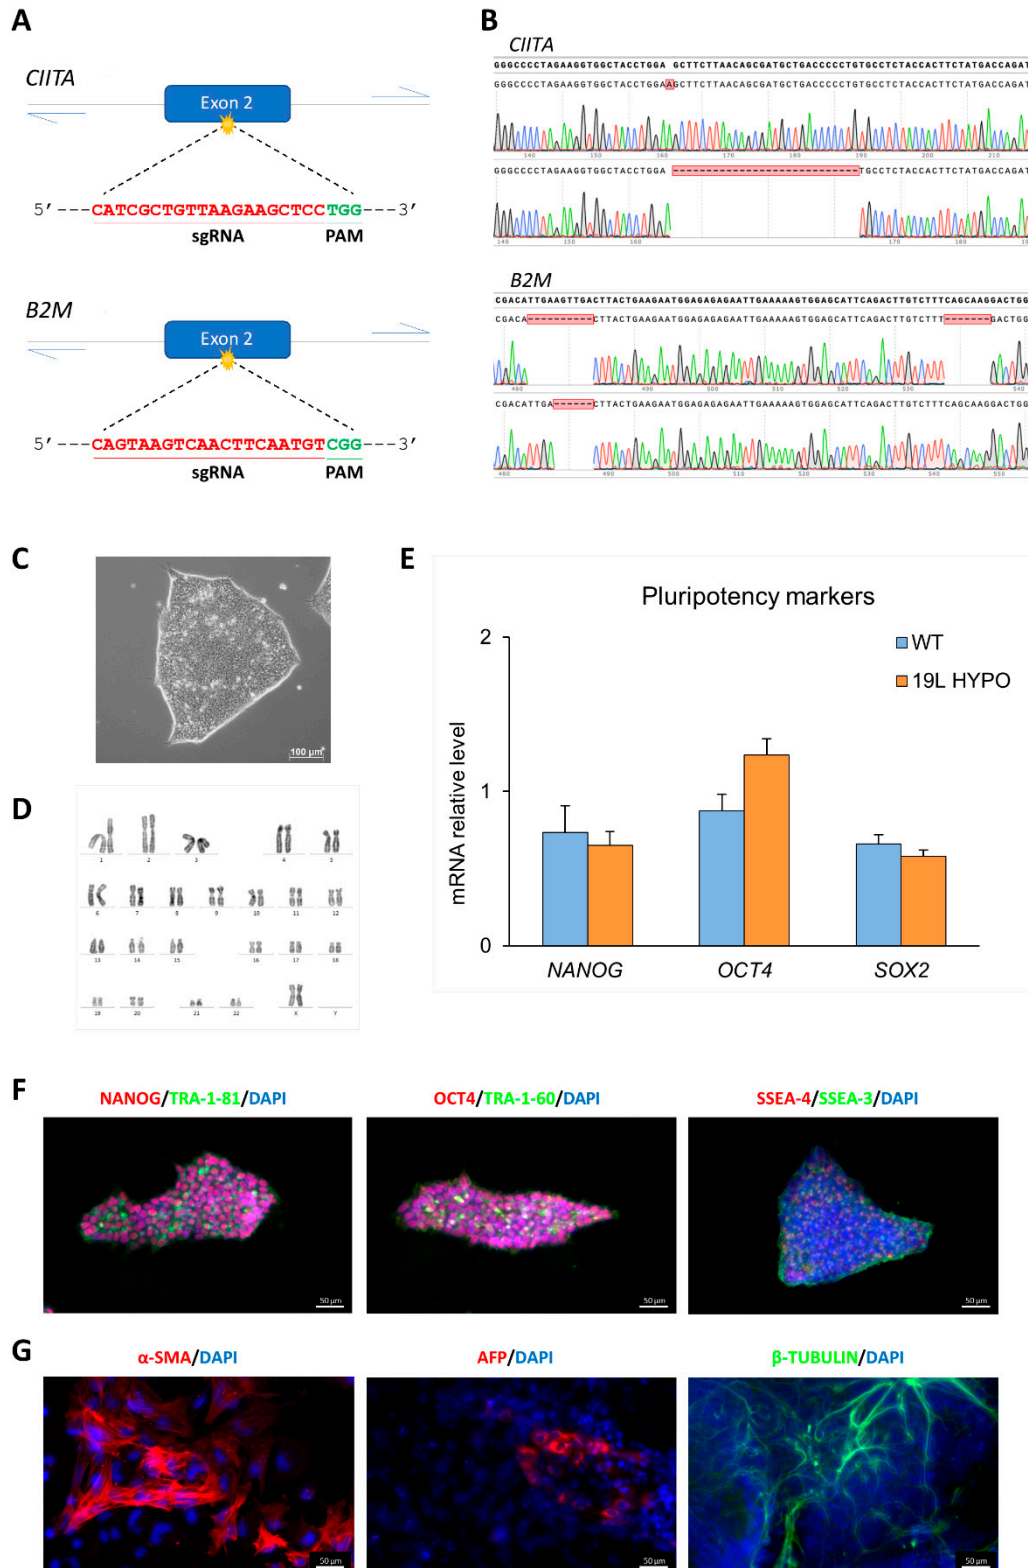

**Figure S2.** Characterization of the 19L HYPO iPSC line. (A) Schematic representation of CRISPR/Cas9 strategy to target *B2M* and *CIITA* genes. (B) Chromatograms showing Sanger sequencing of *B2M* and *CIITA* single alleles isolated by TOPO TA cloning of the *CIITA* and *B2M* compound heterozygous 19L HYPO clone and alignment to the WT sequence using the SnapGene software. (C) Bright-field image showing 19L HYPO cell morphology. Scale bar: 100  $\mu$ m. (D) Karyotype analysis of M HYPO iPSC clone. (E) Analysis of transcript levels of pluripotency marker genes *OCT4*, *NANOG* and *SOX2* by qRT-PCR. The 802-30F iPSC (WT) clone was taken as reference sample. Data are expressed as the mean  $\pm$  standard deviation (SD) of three independent biological experiments. (F) Immunostaining analysis for pluripotency markers. Nuclei were stained with DAPI. Scale bars: 50  $\mu$ m. (G) Immunofluorescence for endodermal marker  $\alpha$ -fetoprotein (AFP), ectodermal marker  $\beta$ III-tubulin ( $\beta$ -TUBULIN) and mesodermal marker  $\alpha$ -smooth muscle actin ( $\alpha$ -SMA) showing iPSC trilineage differentiation potentiality. Scale bars: 50  $\mu$ m.

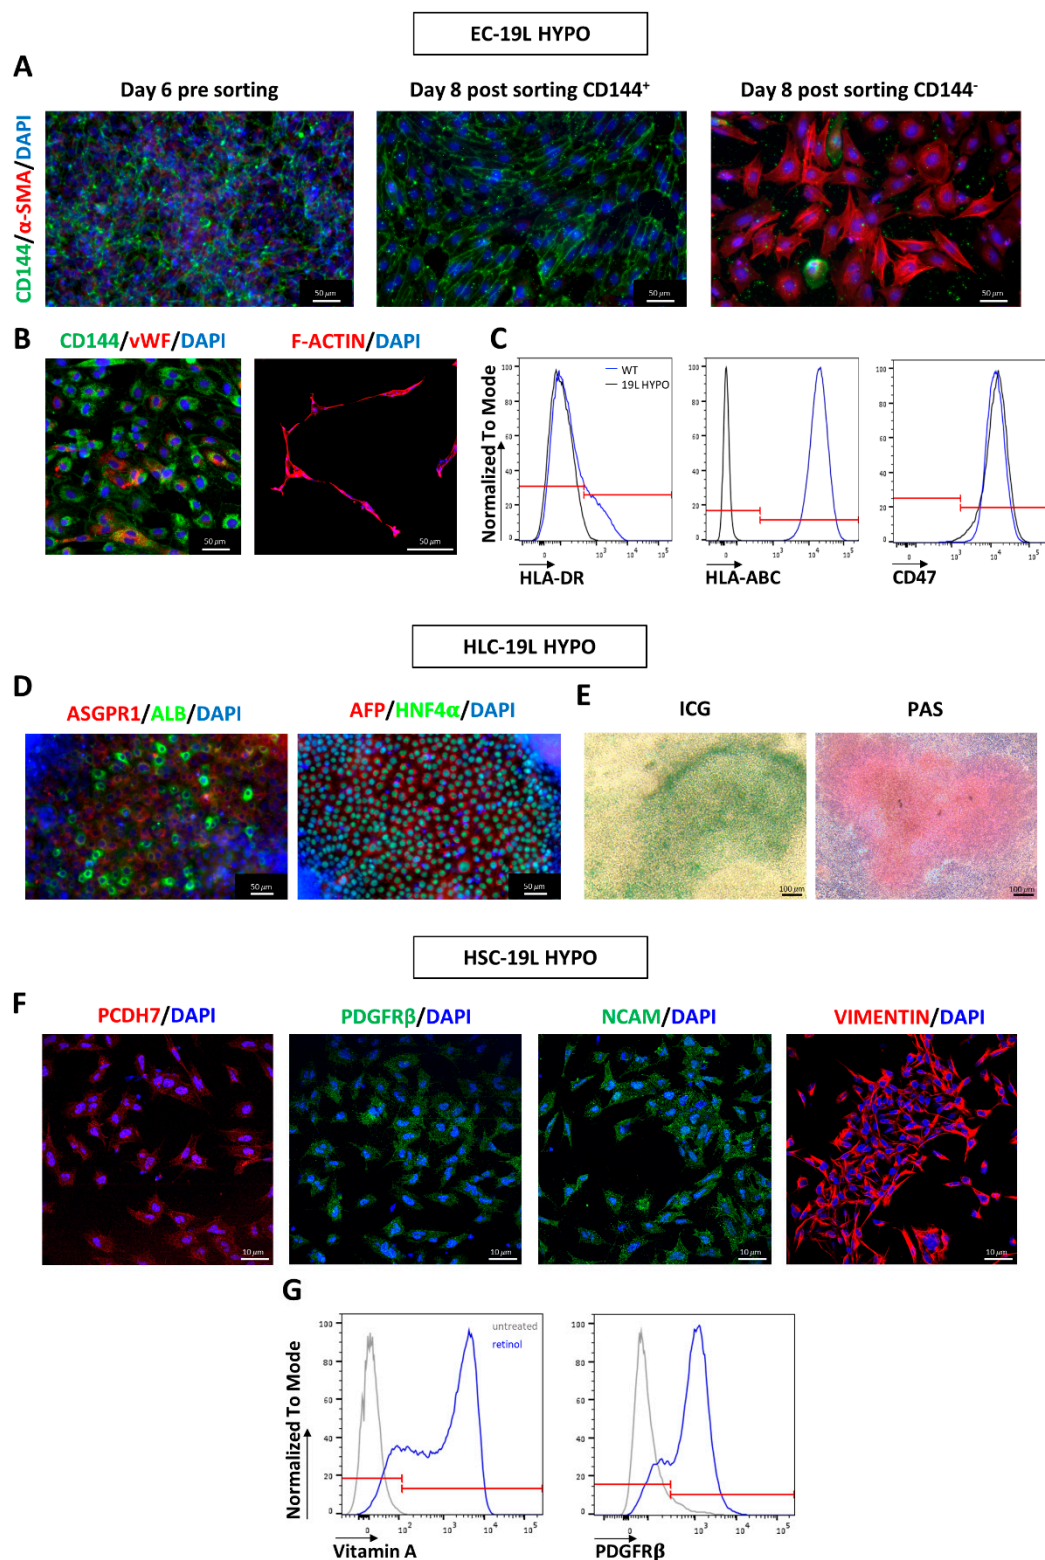

**Figure S3.** Analysis of 19L HYPO ability to differentiate towards endothelial-like cells (EC-19L HYPO), hepatocyte-like cells (HLC-19L HYPO) and hepatic stellate-like cells (HSC-19L HYPO). **(A)** Representative immunofluorescence images showing the expression of CD144 and  $\alpha$ -SMA on iPSC-ECs from 19L HYPO pre- and post-sorting, **(B)** the expression of the endothelial markers CD144 and vWF (left) in EC-19L HYPO and of F-Actin in capillary-like structures formed following the in vitro tube formation assay (right). **(C)** Representative overlay histogram plots of flow cytometric analysis of HLA-DR, HLA-ABC and CD47 in IFN $\gamma$ -treated endothelial cells derived from WT (black) and M HYPO cells (blue). **(D)** Representative immunofluorescence images showing the expression of the hepatocyte markers ASGPR1, ALB, HNF4 $\alpha$  and AFP in HLC-19L HYPO cells. **(E)** Analysis of ICG uptake (left) and PAS staining showing glycogen storage (right) in differentiated cells. **(F)** Protein expression of the HSC markers PCDH7, PDGFR $\beta$ , NCAM and vimentin in HSC-19L HYPO cells

by immunofluorescence analysis. (G) Representative overlay histogram plots of flow cytometry analysis of iPSC-HSC PDGFR $\beta$ -positive cells and vitamin A-positive cells at the end of a 4-day retinol treatment. The red line divides negative (on the left) from positive (on the right) marker expression.

**Table S1:** List of primers used to amplify and sequence on-target and off-target sites

| Target                                                                                      | Sequence                                                                                                                                                                                            |
|---------------------------------------------------------------------------------------------|-----------------------------------------------------------------------------------------------------------------------------------------------------------------------------------------------------|
| <b>On target: <i>B2M</i></b><br>ENSG00000166710<br>chr15:44715428-44715450                  | <u><i>B2M</i> gPCR F:</u> CCCAGCCTGTCTGATACTTGT<br><u><i>B2M</i> gPCR R:</u> TGCGGCATCTTCAAACCTGA<br><u><i>B2M</i> seq F:</u> GAGAGCCTCCAGAGAAAGGC<br><u><i>B2M</i> seq R:</u> TGCTCAACTGCAGGGAAACT |
| <b>OT#1: <i>MACC1</i></b><br>ENSG00000183742<br>chr7:20170788-20170810                      | <u>OT#1 gPCR F:</u> TTCACTGTCACTTTGGGCGG<br><u>OT#1 gPCR R:</u> ACTGTAGGGTCTCACTTGC<br><u>OT#1 seq1 F:</u> TACTGTTGCACACCGTTCTGT<br><u>OT#1 seq2 F:</u> ATCCTGGCTAACACGGTGAA                        |
| <b>OT#2: <i>LINC00992/AC114945.1</i></b><br>ENSG00000248663<br>chr5:117415509-117546298     | <u>OT#2 gPCR F:</u> TGTGCCACCTGAAAATTGCG<br><u>OT#2 gPCR R:</u> GCCTCAGTAGTGACATGGT<br><u>OT#2 seq1 R:</u> GGTAGAAGATCCCAACCAACTCT<br><u>OT#2 seq2 F:</u> TGTGCCACCTGAAAATTGCG                      |
| <b>OT#3: <i>AL034395.1-KAZN</i></b><br>ENSG00000280763<br>chr1:14637585-14637607            | <u>OT#3 gPCR F:</u> GTGACAGTGCACGGGATAGT<br><u>OT#3 gPCR R:</u> CCCGTGAACCTTCTAAGCCC<br><u>OT#3 seq1 F:</u> GAGAAGGGTGGGGACAAAGG<br><u>OT#3 seq2 R:</u> AAGGAGATCAGAGGGGAGGT                        |
| <b>OT#4: <i>LINC01493</i></b> ENSG00000254562<br>11:38646451-38686323:1                     | <u>OT#4 gPCR F:</u> AAGAAAGCTCCTGTCATCTGG<br><u>OT#4 gPCR R:</u> GACCCCTTCTCCCTGAAGTGTG<br><u>OT#4 seq1 F:</u> AAGCATACTGAGCAAAAGTGACG<br><u>OT#4 seq2 R:</u> TGTTAAGAACTGTGTGTTTGCAT               |
| <b>OT#5: <i>RP11-21B23.1-RP11-21B23.2</i></b><br>ENSG00000261393<br>chr16:50378641-50378663 | <u>OT#5 gPCR F:</u> CGGGGCTCCCTCAGTAATA<br><u>OT#5 gPCR R:</u> GGGAAGCACTTCTGACGCTC<br><u>OT#5 seq1 R:</u> CCCTCCACGGCTCTGTAAT<br><u>OT#5 seq2 R:</u> GGGAAGCACTTCTGACGCTC                          |
| <b>OT#6: <i>TTC8</i></b><br>ENSG00000165533<br>chr14:88878928-88878950                      | <u>OT#6 gPCR F:</u> TGTTAATGGGACAGGACCACTC<br><u>OT#6 gPCR R:</u> GCACAGAAGCCAGAAGTTACG<br><u>OT#6 seq1 R:</u> GCACAGAAGCCAGAAGTTACG<br><u>OT#6 seq2 R:</u> GCACAGAAGCCAGAAGTTACG                   |
| <b>OT#7: <i>RYR3</i></b><br>ENSG00000198838<br>15:33310962-33866121                         | <u>OT#7 gPCR F:</u> GAGAGACAGGGCAAAGACCC<br><u>OT#7 gPCR R:</u> AGGCAAACTGGAACCCACA<br><u>OT#7 seq1 F:</u> ACAGAAGACTTTAGCCAGTTGC<br><u>OT#7 seq2 R:</u> GAGGAGGTGGTGGCACTAAA                       |
| <b>OT#8: <i>SETD7</i></b><br>ENSG00000145391<br>4:139495941-139606699                       | <u>OT#8 gPCR F:</u> TTGTTTAACTTTGTTTACTGCAGGC<br><u>OT#8 gPCR R:</u> ATACAGTTCCTGCAAGGATTCCA<br><u>OT#8 seq1 F:</u> TTGGCCCTCTGAAATTTGGGATTA<br><u>OT#8 seq2 R:</u> TGGTAACGACACGCTTTGAA            |

Abbreviations: OT, off-target; F, forward; R, reverse; gPCR, genomic polymerase chain reaction; seq, sequencing

**Table S2:** List of Taqman probes and primers

| Catalog number | Gene Symbol          | Description                              |
|----------------|----------------------|------------------------------------------|
| Hs0275891_g1   | <i>GAPDH</i>         | Glyceraldehyde-3-Phosphate Dehydrogenase |
| Hs00742896_s1  | <i>Oct4</i>          | POU Class 5 Homeobox 1                   |
| Hs02387400_g1  | <i>Nanog</i>         | Nanog Homeobox                           |
| Hs00602736_s1  | <i>SOX2</i>          | SRY-Box Transcription Factor 2           |
| Hs00610080_m1  | <i>Brachyury (T)</i> | T-Box Transcription Factor T             |

| RefSeq         | Gene Symbol      | Sequence 5'-3'                                              |
|----------------|------------------|-------------------------------------------------------------|
| NM_000194.3    | Hs <i>HPRT</i>   | Fwd: GGCAGTATAATCCAAAGATGGTCA<br>Rev: TCCTTTTCACCAGCAAGCTTG |
| NM_022454.4    | Hs <i>SOX17</i>  | Fwd: GGCGCAGCAGAATCCAGA<br>Rev: CCACGACTTGCCCAGCAT          |
| NM_001008540.2 | Hs <i>CXCR4</i>  | Fwd: TCCATTCTTTGCCTCTTTTGC<br>Rev: TGTCCGTCATGCTTCTCAGTT    |
| NM_178849.3    | Hs <i>HNF4α</i>  | Fwd: ACTACATCAACGACCGCCAGT<br>Rev: ATCTGCTCGATCATCTGCCAG    |
| NM_001134.3    | Hs <i>AFP</i>    | Fwd: AAATGCGTTTCTCGTTGCTT<br>Rev: GCCACAGGCCAATAGTTTGT      |
| NM_000477.7    | Hs <i>ALB</i>    | Fwd: GCACAGAATCCTTGGTGAACAG<br>Rev: ATGGAAGGTGAATGTTTCAGCA  |
| NM_001173523.2 | Hs <i>PCDH7</i>  | Fwd: TGTGGGAGCAGGAGACAACA<br>Rev: CACTCTACGAAATGGCTGTTTGC   |
| NM_002609.3    | Hs <i>PDGFRB</i> | Fwd: ATCAGCAGCAAGGACACCAT<br>Rev: CAGGAGAGACAGCAACAGCA      |
| NM_001927.4    | Hs <i>DES</i>    | Fwd: CAACAAGAACAACGACGCCC<br>Rev: GGAATCGTTAGTGCCCTTCA      |

**Table S3:** List of primary and secondary antibodies

| Target Antigen                                                   | Company                  | Catalog Number             |
|------------------------------------------------------------------|--------------------------|----------------------------|
| OCT3/4 (Octamer-binding transcription factor 3/4)                | Santa Cruz               | sc-5279, RRID:AB_628051    |
| NANOG (Nanog homeobox)                                           | Santa Cruz               | sc-33759, RRID:AB_2150401  |
| TRA-1-60 (T cell receptor alpha locus-1-60)                      | Millipore                | MAB4360, RRID:AB_2119183   |
| TRA-1-81 (T cell receptor alpha locus-1-81)                      | Millipore                | MAB4381, RRID:AB_177638    |
| SSEA-3 (Stage-specific embryonic antigen 3)                      | Santa Cruz               | sc-21703, RRID:AB_628288   |
| SSEA-4 (Stage-specific embryonic antigen 4)                      | Santa Cruz               | sc-21704, RRID:AB_628289   |
| $\alpha$ -SMA ( $\alpha$ -Smooth muscle actin)                   | Sigma                    | C6198, RRID:AB_476856      |
| AFP (Alpha-fetoprotein)                                          | Santa Cruz               | sc-51506, RRID:AB_626514   |
| $\beta$ -TUBULIN                                                 | Millipore                | CBL412X, RRID:AB_1977541   |
| CD144 (vascular endothelial-cadherin)                            | R&D                      | AF938, RRID:AB_355726      |
| vWF (von Willebrand Factor)                                      | DAKO                     | A0082, RRID:AB_2315602     |
| ASPGR1 (Asialoglycoprotein receptor)                             | Santa Cruz               | sc-52623, RRID:AB_667806   |
| HNF4 $\alpha$ (Hepatocyte nuclear factor 4 alpha)                | Abcam                    | ab92378, RRID:AB_10562973  |
| ALB (Albumin)                                                    | Bethyl                   | A80-129A, RRID:AB_67016    |
| PCDH7 (Protocadherin 7)                                          | Abcam                    | ab139274, RRID:AB_2868608  |
| PDGFR $\beta$ (Platelet-derived growth factor receptor $\beta$ ) | Abcam                    | ab32570, RRID:AB_777165    |
| NCAM (Neural cell adhesion molecule)                             | Millipore                | AB5032, RRID:AB_2291692    |
| VIMENTIN                                                         | Thermo Fisher Scientific | PA5-27231, RRID:AB_2544707 |
| <b>Secondary Antibodies</b>                                      |                          |                            |
| Donkey anti-Rabbit IgG (H + L) Alexa Fluor 546                   | Thermo Fisher Scientific | A10040, RRID:AB_2534016    |
| Goat anti-Mouse IgM Alexa Fluor 488                              | Thermo Fisher Scientific | A-21042, RRID: AB_2535711  |
| Donkey anti-Mouse IgG (H + L) Alexa Fluor 546                    | Thermo Fisher Scientific | A10036, RRID: AB_2534012   |
| Goat anti-Rat IgM, Alexa Fluor 488                               | Thermo Fisher Scientific | A-21212, RRID: AB_2535798  |
| Donkey anti-Goat IgG (H + L) Alexa Fluor 488                     | Thermo Fisher Scientific | A11055, RRID:AB_2411589    |
| Goat anti-Rabbit IgG (H + L) Alexa Fluor 488                     | Thermo Fisher Scientific | A-21206, RRID: AB_2289872  |
